# Supplementary material for: Human vtRNA1-1 Levels Modulate Signaling Pathways and Regulate Apoptosis in Human Cancer Cells
Source: Biomolecules. 2020 Apr 16;10(4):614. doi: 10.3390/biom10040614 (PMC7226377; doi:10.3390/biom10040614)
Supplement: Supplementary file 1 [file biomolecules-10-00614-s001.zip › Supplementary Dataset S1.xlsx]

## Sheet: mRNAseq_1-1_1-3 vs. WT_starv.
HeLa DE_vtRNA1-1 KO vs. WT starvation									HeLa DE_vtRNA1-3 KO vs. WT starvation
#	DE Genes unique for starvation	Log2 FC		#	DE Genes with a minimum delta log2 FC ±1 between control and starvation	Log2 FC			#	DE Genes unique for starvation	c		#	DE Genes with a minimum delta log2 FC ±1 between control and starvation	Log2 FC
1	AP000866.2	#VALUE!		1	AC009435.1	#VALUE!			1	ESRP1	#NAME?		1	AC021683.2	#VALUE!
2	CACNB2	#VALUE!		2	AC026336.3	#VALUE!			2	TM4SF5	#NAME?		2	AC090204.1	#VALUE!
3	IGFBPL1	#VALUE!		3	AC073365.1	#VALUE!			3	AC003092.1	#NAME?		3	AC097641.1	#VALUE!
4	TAF7L	#VALUE!		4	AC079054.1	#VALUE!			4	AC112236.1	#NAME?		4	AL627309.3	#NAME?
5	LRRC37A4P	#VALUE!		5	AC090204.1	#VALUE!			5	SPNS3	#NAME?		5	AOC1	#VALUE!
6	AC126603.1	#VALUE!		6	AC090340.1	#VALUE!			6	SCN1A	#VALUE!		6	AR	#VALUE!
7	MFNG	#VALUE!		7	AC092810.3	#VALUE!			7	AL355315.1	#VALUE!		7	FEZF1-AS1	#VALUE!
8	AL357992.1	#VALUE!		8	AC097641.1	#VALUE!			8	CACNB2	#VALUE!		8	FNDC1	#VALUE!
9	RBP4	#VALUE!		9	AC120498.1	#VALUE!			9	MCF2	#VALUE!		9	GAGE2A	#VALUE!
10	CLDN3	#VALUE!		10	AL121759.2	#VALUE!			10	TAF7L	#VALUE!		10	GAS2L2	#VALUE!
11	BSN-DT	#VALUE!		11	AL121885.2	#VALUE!			11	ZNF781	#VALUE!		11	HS3ST5	#VALUE!
12	MUC17	#VALUE!		12	AL163636.2	#VALUE!			12	LINC00706	#VALUE!		12	KCNJ18	#VALUE!
13	RPS6P25	#VALUE!		13	AOC1	#VALUE!			13	AC006480.2	#VALUE!		13	KIRREL3	#VALUE!
14	AC016168.2	#VALUE!		14	AP000357.2	#VALUE!			14	PTGER3	#VALUE!		14	LMOD1	#VALUE!
15	AC010768.2	#VALUE!		15	APBA2	#VALUE!			15	AC000120.3	#VALUE!		15	MAGEA1	#VALUE!
16	GJB2	#VALUE!		16	BCHE	#VALUE!			16	AC016168.2	#VALUE!		16	MIR1915	#VALUE!
17	MIR5581	#VALUE!		17	CKMT1A	#VALUE!			17	LINC01126	#VALUE!		17	PCDH17	#VALUE!
18	MIR497HG	#VALUE!		18	DIRAS3	#VALUE!			18	NKAIN3-IT1	#VALUE!		18	PCDHGA5	#VALUE!
19	AL450992.2	#VALUE!		19	DUSP26	#VALUE!			19	CCL16	#VALUE!		19	PCP4	#VALUE!
20	TRIL	#VALUE!		20	EYA2	#VALUE!			20	SCARNA8	#VALUE!		20	PLXNA4	#VALUE!
21	AL590235.1	#VALUE!		21	FAM84A	#VALUE!			21	ATOH7	#VALUE!		21	PQLC2L	#VALUE!
22	AC002985.1	#VALUE!		22	FZD10	#VALUE!			22	FMO4	#VALUE!		22	PTPRD	#VALUE!
23	AC100803.1	#VALUE!		23	GAGE2A	#VALUE!			23	LRRN1	#VALUE!		23	ROS1	#VALUE!
24	PCDHA1	#VALUE!		24	GDF5	#VALUE!			24	VIT	#VALUE!		24	SERTM1	#VALUE!
25	MRO	#VALUE!		25	GIPR	#VALUE!			25	FFAR2	#VALUE!		25	SLC24A3	#VALUE!
26	AL662890.1	#VALUE!		26	GMPR	#VALUE!			26	AC018638.7	#VALUE!		26	TMEM176B	#VALUE!
27	AL590666.3	#VALUE!		27	HLA-DRA	#VALUE!			27	AC108125.1	#VALUE!		27	VTRNA1-3	#VALUE!
28	AC007326.5	#VALUE!		28	HNRNPA1P38	#VALUE!			28	AC114977.1	#VALUE!		28	WIF1	#VALUE!
29	AC078925.1	#VALUE!		29	KRT13	#VALUE!			29	LILRB5	#VALUE!		29	PLPP4	5.87609
30	AC106818.1	#VALUE!		30	LGI3	#VALUE!			30	AC106818.1	#VALUE!		30	AC100802.1	5.22022
31	WRB-SH3BGR	#VALUE!		31	LINC01419	#VALUE!			31	BCHE	#VALUE!		31	TNFRSF9	5.20888
32	LINC01150	#VALUE!		32	MIR1-1HG-AS1	#VALUE!			32	PCDHGB6	#VALUE!		32	HSPB7	3.26675
33	AC011239.1	#VALUE!		33	MOXD1	#VALUE!			33	AC096921.2	#VALUE!		33	NPAS4	-2.25384
34	EDDM13	#VALUE!		34	NDP	#VALUE!			34	DUSP27	#VALUE!		34	SORBS1	-2.35942
35	AC010654.1	#VALUE!		35	NRN1	#VALUE!			35	EDDM13	#VALUE!		35	PNMA2	-2.36927
36	PPDPFL	#VALUE!		36	PCDHA11	#VALUE!			36	AK3P3	#VALUE!		36	ITK	-2.37537
37	AC093152.1	#VALUE!		37	PCP4	#VALUE!			37	OTOGL	#VALUE!		37	PCSK6	-2.5568
38	FSBP	#VALUE!		38	PDCD1LG2	#NAME?			38	SNORD114-1	#VALUE!		38	HOXA9	-3.26111
39	SNORD114-1	#VALUE!		39	PIWIL3	#VALUE!			39	AC093655.2	#VALUE!		39	INSRR	-3.30996
40	AC132068.1	#VALUE!		40	PLXNA4	#VALUE!			40	AC074194.1	#VALUE!		40	MYLK	-3.3342
41	AC093655.2	#VALUE!		41	RASGEF1A	#VALUE!			41	AC009118.1	#VALUE!		41	SPINK13	-3.4096
42	LY75	#VALUE!		42	RBP1	#VALUE!			42	TLR5	#VALUE!		42	CACNG4	-3.42931
43	PTPRD	#VALUE!		43	RF02160	#VALUE!			43	AC027796.4	#VALUE!		43	QPRT	-3.43465
44	AC018512.1	#VALUE!		44	SERTM1	#VALUE!			44	AC006600.2	#VALUE!		44	AC009086.2	-3.55712
45	RPS20P22	#VALUE!		45	SLC24A3	#VALUE!			45	TEKT5	#VALUE!		45	PRRT2	-3.70596
46	AC074194.1	#VALUE!		46	SMO	#VALUE!			46	PHYHIPL	#VALUE!		46	PRKAR2B	-3.72465
47	HLA-DPA1	#VALUE!		47	SRL	#VALUE!			47	ZNF208	#VALUE!		47	MXRA5	-3.72666
48	CAMTA1-DT	#VALUE!		48	TFCP2L1	#VALUE!			48	AL807752.3	#VALUE!		48	CNN1	-3.84807
49	RN7SL405P	#VALUE!		49	ZNF285	#VALUE!			49	LINC01087	#VALUE!		49	HNRNPA1P38	-4.05738
50	TRIM74	#VALUE!		50	ZNF354C	#VALUE!			50	AC063943.1	#VALUE!		50	AC023024.2	-4.06401
51	HRH4	#VALUE!		51	ZNF521	#VALUE!			51	AC016590.3	#VALUE!		51	RASGEF1B	-4.0951
52	AC027796.4	#VALUE!		52	AGTR2	8.51466			52	AC027228.3	#VALUE!		52	NDNF	-4.22415
53	AC005614.2	#VALUE!		53	GALNT18	6.64511			53	HMGCLL1	#VALUE!		53	HOXA13	-4.23393
54	TEKT5	#VALUE!		54	SLC47A2	6.10523			54	RBM44	#VALUE!		54	TDRP	-4.39346
55	LINC02323	#VALUE!		55	AC100802.1	5.68363			55	CCR1	#VALUE!		55	AC025154.2	-4.45216
56	PCBP2-OT1	#VALUE!		56	KCNJ3	5.46891			56	AC112907.3	#VALUE!		56	MAPK4	-4.48098
57	IL20RA	#VALUE!		57	AL357507.1	5.31742			57	HSPB2	#VALUE!		57	MXRA5Y	-4.52529
58	AC011445.2	#VALUE!		58	CPA3	5.08423			58	Z82188.2	#VALUE!		58	HOTTIP	-4.64739
59	AC106772.1	#VALUE!		59	AL157937.1	4.4623			59	AC010210.1	#VALUE!		59	MOXD1	-4.6763
60	CRYZL2P-SEC16B	#VALUE!		60	TMEM200A	4.44546			60	AC016745.2	#VALUE!		60	ULK4P1	-4.69106
61	AC069528.2	#VALUE!		61	AL022157.1	4.37716			61	GJA10	#VALUE!		61	ZNF702P	-4.71579
62	RNU1-103P	#VALUE!		62	TMEM156	4.35897			62	PLPPR4	#VALUE!		62	CADPS2	-4.90035
63	AL158829.1	#VALUE!		63	IFI16	4.11941			63	AC090510.1	#VALUE!		63	ASB2	-4.9438
64	CTB-178M22.2	#VALUE!		64	AC079467.1	3.85036			64	C4orf54	#VALUE!		64	POSTN	-5.09995
65	AC110285.6	#VALUE!		65	AC144831.1	3.52541			65	LINC02057	#VALUE!		65	AC073365.1	-5.24812
66	ULK4P2	#VALUE!		66	PADI3	3.48472			66	AC145543.1	#VALUE!		66	ACTG2	-5.67255
67	LGI2	#VALUE!		67	AC245100.6	3.47614			67	AC007878.1	#VALUE!		67	IGFN1	-7.52247
68	AC131649.1	#VALUE!		68	ALPP	3.47054			68	GABRR2	#VALUE!		68	HUNK	-7.72948
69	AC107373.1	#VALUE!		69	ZNF93	3.10777			69	AC004678.2	#VALUE!		69	SLC17A9	-8.9018
70	ARHGDIG	#VALUE!		70	THSD7A	3.0719			70	AC012307.1	#VALUE!
71	FMO3	#VALUE!		71	MFAP4	2.85318			71	AC011466.4	#VALUE!
72	SAPCD1-AS1	#VALUE!		72	CSTA	2.84687			72	MIR4482	#VALUE!
73	AL033527.3	#VALUE!		73	PTX3	2.77224			73	AL139099.2	#VALUE!
74	AC118553.1	#VALUE!		74	LURAP1L-AS1	2.36471			74	AC087721.1	#VALUE!
75	AL139424.3	#VALUE!		75	RASSF10	2.34554			75	AC092535.3	#VALUE!
76	RNU6-343P	#VALUE!		76	ASS1	2.17424			76	TRIM22	#VALUE!
77	AC005899.6	#VALUE!		77	NYAP2	2.16067			77	AC008770.3	#VALUE!
78	AL137002.1	#VALUE!		78	ABCA3	-2.0079			78	C8orf34	#VALUE!
79	GJA10	#VALUE!		79	CLDN4	-2.02771			79	SLC7A14	#VALUE!
80	GAPDHP72	#VALUE!		80	AL645608.2	-2.14669			80	FFAR4	#VALUE!
81	AC020661.1	#VALUE!		81	PRODH	-2.15436			81	AC007192.1	#VALUE!
82	AC012307.1	#VALUE!		82	RGCC	-2.1548			82	AP003097.2	#VALUE!
83	SYNGR4	#VALUE!		83	MCF2L	-2.15887			83	WASF3-AS1	#VALUE!
84	AP003396.5	#VALUE!		84	AL023284.4	-2.18127			84	AP005019.3	#VALUE!
85	HSPB2	#VALUE!		85	TM4SF1-AS1	-2.2569			85	LINC02266	#VALUE!
86	AC006058.3	#VALUE!		86	MAML3	-2.30013			86	IL1RN	#VALUE!
87	MIR33B	#VALUE!		87	FRMD4A	-2.34941			87	AC112693.3	#VALUE!
88	AC013724.1	#VALUE!		88	FAM163A	-2.36527			88	AC124312.5	#VALUE!
89	AC114956.1	#VALUE!		89	LRRC26	-2.37277			89	GGNBP1	#VALUE!
90	AC123768.2	#VALUE!		90	ALPL	-2.4262			90	AC006012.1	#VALUE!
91	AC091551.1	#VALUE!		91	PLEKHG1	-2.4681			91	AC084125.4	#VALUE!
92	SIGLEC10	#VALUE!		92	TESC	-2.47129			92	TIAM1	#VALUE!
93	AP001107.1	#VALUE!		93	MATK	-2.57455			93	USP9YP3	#VALUE!
94	ASB2	#VALUE!		94	SLC4A4	-2.58459			94	OR2A3P	#VALUE!
95	RMST	#VALUE!		95	ADGRG2	-2.69347			95	AC113189.2	#VALUE!
96	AP000646.1	#VALUE!		96	AP005019.1	-2.70923			96	INSM2	#VALUE!
97	AC091057.3	#NAME?		97	FP236383.1	-2.96456			97	GS1-24F4.2	#VALUE!
98	AC003092.1	#NAME?		98	FP671120.1	-2.96456			98	AC084024.1	#VALUE!
99	EVI2B	#NAME?		99	PNMA6A	-3.00576			99	AC020658.6	#VALUE!
100	AC002480.1	#NAME?		100	NUP210	-3.05468			100	AL160191.1	#VALUE!
101	AC116025.2	#NAME?		101	C5AR2	-3.08977			101	AL353997.2	#VALUE!
102	GOLGA8Q	#NAME?		102	KCNJ18	-3.16914			102	LINC00954	#VALUE!
103	AC079944.2	#NAME?		103	CHST8	-3.19916			103	AC074198.1	#VALUE!
104	LINC02407	#NAME?		104	TNFRSF18	-3.23462			104	AC120498.3	#VALUE!
105	AC002066.1	#NAME?		105	PCSK6	-3.26513			105	AC080129.2	#VALUE!
106	SFTA1P	#NAME?		106	JAKMIP3	-3.30003			106	AC020765.3	#VALUE!
107	PAGE2	#NAME?		107	KCNIP3	-3.4377			107	AC009812.3	#VALUE!
108	AC008758.1	#NAME?		108	NRG2	-3.49526			108	AC099811.2	#VALUE!
109	AL033529.1	#NAME?		109	HLA-DMB	-3.60642			109	LINC02263	#VALUE!
110	RNU4-2	6.04135		110	TRIM6	-3.68983			110	LINC01268	#VALUE!
111	PLPP4	5.69016		111	SLCO5A1	-3.83849			111	SPDYE18	#VALUE!
112	AC018413.1	5.4581		112	FAM189A2	-3.87143			112	CCDC114	#VALUE!
113	SP140	5.45209		113	HUNK	-3.90592			113	ST3GAL6-AS1	#VALUE!
114	AL356515.1	5.13861		114	CD74	-3.91633			114	PLN	#VALUE!
115	LINC01629	4.94519		115	RAB3C	-3.92209			115	AL354760.1	#VALUE!
116	PCDH1	4.84352		116	SV2B	-3.93957			116	SMIM15-AS1	#VALUE!
117	PSTPIP1	4.74338		117	ACTG2	-4.02131			117	CYS1	#VALUE!
118	CXCL8	4.59817		118	GPR20	-4.06775			118	TEK	#VALUE!
119	LINC00565	4.44449		119	FAM198A	-4.08269			119	MSC	8.09634
120	AC019117.2	4.34577		120	PMCH	-4.10571			120	AC034213.1	5.7831
121	MYEOV	4.34263		121	KALRN	-4.14415			121	FGF21	5.5545
122	AC121764.3	4.32131		122	AC073862.5	-4.19309			122	LINC01397	4.89886
123	OR5AN1	4.22528		123	MXRA5	-4.22966			123	KLHDC7B	4.79344
124	OSCAR	4.21338		124	KCNK3	-4.24409			124	RNU4-2	4.75106
125	DAPK1	4.21299		125	C4orf19	-4.26228			125	OSCAR	4.60123
126	AC009318.2	4.20882		126	DLG2	-4.2747			126	LINC01714	4.5616
127	AC034213.1	4.17377		127	PART1	-4.32287			127	ANGPTL2	4.49175
128	MIR23B	4.03192		128	NR5A2	-4.32346			128	UNC5B	4.48774
129	GOLGA8N	4.01686		129	AS3MT	-4.40803			129	S100P	4.46399
130	EREG	4.01045		130	SALL1	-4.48138			130	PCDH1	4.3946
131	USP44	3.99086		131	GPT	-4.49548			131	NPM1P40	4.36117
132	LINC00601	3.96392		132	PLCXD3	-4.50672			132	TTC36	4.226
133	IL24	3.90797		133	CFAP58-DT	-4.50698			133	VIP	4.13091
134	AC130371.2	3.87804		134	SPINK13	-4.5448			134	CHAC1	4.12113
135	DUSP6	3.87237		135	PARM1	-4.5499			135	NECAB2	4.07712
136	CLEC2B	3.77412		136	LINC00482	-4.58375			136	NGF	3.98845
137	GOLGA8S	3.73965		137	ADAM33	-4.66925			137	MYEOV	3.94844
138	SERTAD4-AS1	3.69888		138	SYT13	-4.72521			138	TH	3.93108
139	TSPAN2	3.694		139	HOXC12	-5.02288			139	COL6A3	3.9208
140	CMTM7	3.65462		140	KLHL38	-5.06291			140	SDR16C5	3.88187
141	AP001160.1	3.64346		141	AC008514.1	-5.11963			141	AL157937.1	3.86486
142	RNU1-1	3.63889		142	MARCOL	-5.15124			142	SULT1E1	3.81889
143	RNU1-2	3.63889		143	RIMS1	-5.38249			143	AC005037.1	3.79548
144	RNU1-27P	3.63889		144	SPINK6	-5.54342			144	BEX2	3.78199
145	RNU1-28P	3.63889		145	LINC02065	-5.68926			145	STC2	3.76666
146	RNU1-3	3.63889		146	CA5A	-5.8015			146	FLRT1	3.76413
147	RNU1-4	3.63889		147	DPYSL5	-5.84362			147	IGF2BP2	3.75162
148	RNVU1-18	3.63889		148	CACNA1H	-6.30435			148	TMEM156	3.69679
149	AL162632.1	3.54142		149	SEPT5-GP1BB	-29.8326			149	STK32A	3.69672
150	AC073072.1	3.52384							150	DHRS2	3.67941
151	AC109449.1	3.51663							151	FOLR2	3.63682
152	LAMC2	3.49093							152	AL357507.1	3.61468
153	AC084859.1	3.46261							153	AL135744.1	3.5913
154	ZNF804A	3.4219							154	AD000671.2	3.5697
155	CHST2	3.41902							155	INHBE	3.55538
156	ALPG	3.41559							156	MT-TM	3.37582
157	PTGES	3.40694							157	SERTAD4-AS1	3.37091
158	ANGPTL2	3.36886							158	RTL9	3.35343
159	TTC3P1	3.36508							159	LCN2	3.30937
160	VSIR	3.35289							160	CALCB	3.29615
161	TOX2	3.33425							161	RPLP0P2	3.2926
162	CXCL1	3.3132							162	DDIT4-AS1	3.27412
163	HRK	3.30028							163	MIR3189	3.26742
164	SPRY4	3.2677							164	LINC00460	3.26337
165	MSC-AS1	3.26404							165	FUT1	3.25257
166	SCEL	3.26299							166	MSC-AS1	3.25032
167	AP001148.1	3.20516							167	CMTM7	3.20626
168	AC069499.1	3.20284							168	AC083899.2	3.17428
169	HSD17B2	3.15029							169	AC005832.4	3.16795
170	DHRS2	3.10313							170	CGB8	3.13734
171	ANTXR2	3.09207							171	SCARNA2	3.12357
172	GOLGA8R	3.07521							172	GDF15	3.11216
173	AL355512.1	3.03907							173	TRIB3	3.10779
174	FOSL1	3.02997							174	SESN2	3.10641
175	SLC16A6	3.02449							175	LINC01081	3.05965
176	CES1	3.01029							176	COL5A3	3.0404
177	STC2	2.9866							177	NCAN	3.03593
178	SLIT2	2.98583							178	HSPB6	3.01444
179	CHI3L1	2.97973							179	LINC00163	2.9833
180	RPLP0P2	2.97498							180	KCTD16	2.97603
181	ZBED2	2.97353							181	MPP4	2.93213
182	LINC01239	2.93947							182	SPATA32	2.92322
183	RASGRF2	2.92826							183	VSIR	2.86748
184	PADI1	2.91993							184	AC073072.1	2.83415
185	PGF	2.91337							185	LINC00601	2.80578
186	KCTD16	2.913							186	AC007317.1	2.79999
187	AC009229.4	2.90819							187	ANKRD1	2.7897
188	CXCL2	2.87161							188	MT-TI	2.78303
189	FAM9B	2.86563							189	RNF39	2.77725
190	CD163L1	2.85836							190	MIR325HG	2.74579
191	DHRS3	2.84372							191	DHRS3	2.74479
192	SYTL3	2.84209							192	ADD2	2.74023
193	IGFBP1	2.80817							193	MOV10L1	2.72728
194	KIAA1551	2.74642							194	DDIT3	2.72141
195	RB1CC1	2.72639							195	LIPH	2.70812
196	CDKN2B	2.72584							196	ZNF541	2.68866
197	ANKRD12	2.72247							197	SPINK1	2.68206
198	TGM2	2.70691							198	MIR663B	2.6635
199	RGS17	2.70125							199	IGDCC4	2.61961
200	IER3	2.66957							200	MIR3197	2.6142
201	AC074183.2	2.66671							201	AC131009.2	2.61069
202	CITED4	2.64786							202	GADD45B	2.5966
203	ARHGAP24	2.62338							203	AC245100.6	2.59505
204	AC083899.2	2.61806							204	SERPINA3	2.59148
205	PDZD2	2.61562							205	KIF21B	2.56269
206	MAFF	2.57902							206	MAFF	2.56016
207	FMOD	2.57781							207	IL6	2.55661
208	TXNIP	2.56617							208	LINC00887	2.55038
209	AP000432.2	2.55837							209	FLNC	2.53692
210	ZCCHC18	2.55583							210	LURAP1L-AS1	2.52227
211	MICAL2	2.55109							211	PPP1R15A	2.52086
212	PIBF1	2.53703							212	RPL13AP20	2.51902
213	LCN2	2.52835							213	FIBIN	2.48982
214	PAK3	2.51935							214	ADM2	2.48381
215	PTPRG	2.50015							215	SPRY4	2.47044
216	LAMP3	2.4928							216	SCG5	2.44914
217	ABLIM3	2.48991							217	IGFBP1	2.447
218	ETV5	2.48215							218	AC074183.2	2.40177
219	DUSP5	2.47337							219	CAMTA2	2.39971
220	MMP2	2.4677							220	FOXD1	2.37638
221	LPAR1	2.46423							221	SAMD12-AS1	2.36797
222	SESN2	2.44653							222	ERFE	2.3335
223	EEA1	2.42218							223	ETV5	2.32516
224	DDIT3	2.41986							224	FAM129A	2.31846
225	RFX2	2.40818							225	AMZ1	2.31833
226	ITGA10	2.38392							226	UPP1	2.30687
227	FAM129A	2.36625							227	RNA5S1	2.29917
228	ATRX	2.36155							228	RNA5S10	2.29917
229	CWC22	2.36047							229	RNA5S11	2.29917
230	FST	2.35735							230	RNA5S12	2.29917
231	FRMD3	2.35598							231	RNA5S13	2.29917
232	EPHA4	2.35034							232	RNA5S14	2.29917
233	TBX2	2.34653							233	RNA5S15	2.29917
234	CLDN1	2.34653							234	RNA5S16	2.29917
235	SPOCD1	2.34603							235	RNA5S17	2.29917
236	IMPDH1P8	2.34532							236	RNA5S2	2.29917
237	CEP152	2.34381							237	RNA5S3	2.29917
238	FAP	2.33786							238	RNA5S4	2.29917
239	PPIG	2.32246							239	RNA5S5	2.29917
240	FZD8	2.31791							240	RNA5S6	2.29917
241	GPSM3	2.31455							241	RNA5S7	2.29917
242	GCC2	2.30695							242	RNA5S8	2.29917
243	CXCL3	2.30186							243	AL359220.1	2.28029
244	GPR146	2.30021							244	CSTA	2.27597
245	PHLDA1	2.29168							245	DDIT4	2.2541
246	ADGRL4	2.27173							246	IER3	2.22374
247	RIF1	2.2704							247	RNU1-1	2.22079
248	ARHGAP5	2.26853							248	RNU1-2	2.22079
249	PPP1R15A	2.26849							249	RNU1-27P	2.22079
250	WNT5A	2.26818							250	RNU1-28P	2.22079
251	ITGB2	2.26491							251	RNU1-3	2.22079
252	RAPGEF3	2.26224							252	RNU1-4	2.22079
253	KIF20B	2.26212							253	RNVU1-18	2.22079
254	ZBTB41	2.26041							254	CASC11	2.21149
255	SERPINE2	2.25988							255	LHX6	2.20925
256	PHF3	2.25847							256	AL355512.1	2.20174
257	AL359220.1	2.25661							257	ABLIM3	2.19347
258	ERRFI1	2.24734							258	G0S2	2.18586
259	PPFIBP2	2.24663							259	AC093001.1	2.18376
260	LRRC75A	2.2418							260	CXCL2	2.18099
261	RAD50	2.23398							261	CEMIP	2.17478
262	AC073254.1	2.22505							262	NR1D1	2.17272
263	RGS16	2.22294							263	KRT16	2.1721
264	PCED1B	2.22226							264	RGS16	2.17159
265	BRCA2	2.21398							265	ZNF585A	2.17151
266	IRF2BPL	2.20775							266	FOSL1	2.16698
267	SLFN5	2.2013							267	TTLL9	2.16141
268	SMC6	2.19523							268	ATF3	2.15707
269	SLC7A11	2.19341							269	DYSF	2.14715
270	C6orf141	2.18906							270	PLAC1	2.14675
271	PGPEP1	2.1725							271	AC002456.1	2.1438
272	PCSK5	2.16999							272	RPS6KA2-IT1	2.13431
273	FBXL13	2.16452							273	PCK2	2.12188
274	AFAP1L2	2.15212							274	LINC01133	2.12117
275	KTN1	2.14947							275	IL11	2.11989
276	TMEM158	2.14844							276	ASNS	2.11205
277	N4BP2	2.1293							277	CTSS	2.11046
278	JUP	2.12153							278	KRT80	2.10812
279	PHIP	2.11876							279	AC133785.1	2.10573
280	FIBIN	2.11703							280	TOX2	2.10556
281	DAAM1	2.11682							281	LETM2	2.10377
282	GAS6-DT	2.115							282	DMGDH	2.10343
283	SPINK4	2.10187							283	HRK	2.1
284	CSF1	2.09672							284	AC015912.3	2.07903
285	PLCB4	2.09151							285	ALOXE3	2.0752
286	EIF5B	2.08396							286	TSC22D3	2.0738
287	FAM111B	2.08308							287	ERRFI1	2.05627
288	LACC1	2.07837							288	PAQR5	2.04713
289	ATP2B1	2.07781							289	MFAP3L	2.03482
290	ERFE	2.06411							290	CXCL16	2.02537
291	NIPBL	2.06181							291	LIMS3	2.02463
292	DDIT4	2.05884							292	TRPM2	2.0211
293	OASL	2.0579							293	KLF2	2.01853
294	AL355482.1	2.05156							294	CDKN2B	2.01015
295	FRMD6	2.04696							295	RPSAP58	2.00795
296	MFAP3L	2.0446							296	P2RX1	-2.00189
297	RNY1	2.04443							297	IFI44L	-2.00283
298	ESF1	2.0426							298	CEP83	-2.00528
299	TRIB2	2.0405							299	RGCC	-2.01602
300	EPHA2	2.0351							300	AP002761.4	-2.01654
301	AC138207.2	2.03292							301	STK38L	-2.02569
302	NOG	2.02897							302	MYLK3	-2.0306
303	ITGA2	2.02572							303	PLAG1	-2.031
304	JMJD1C	2.02337							304	FAT4	-2.03597
305	CRYBG1	2.01914							305	C2orf92	-2.03728
306	PRKCE	2.01892							306	CERKL	-2.04479
307	CENPE	2.01601							307	RETREG1	-2.04627
308	SUSD2	2.00107							308	FAM227A	-2.05244
309	AC105460.1	-2.00441							309	AL021368.2	-2.05429
310	SYNC	-2.00878							310	AL023284.4	-2.06332
311	SLC46A3	-2.01135							311	PALM2	-2.06724
312	PTP4A3	-2.02171							312	LINC00923	-2.06808
313	NME1-NME2	-2.02981							313	CCNE2	-2.06911
314	ZDHHC23	-2.0382							314	USO1	-2.07806
315	RCN3	-2.04953							315	CD24	-2.08461
316	AP002807.1	-2.05031							316	HERC2P2	-2.0856
317	LINC00668	-2.05255							317	FSTL1	-2.09588
318	GALNT16	-2.07144							318	TAGLN	-2.10527
319	DNM1	-2.07446							319	MEG8	-2.10572
320	FOXD3-AS1	-2.08108							320	SEMA3D	-2.10601
321	Z99129.4	-2.08726							321	ABCA5	-2.10949
322	C5orf46	-2.10995							322	TOP2B	-2.11508
323	ECM1	-2.11485							323	PWAR5	-2.11656
324	GSTA4	-2.11689							324	AC093525.10	-2.12496
325	MAMDC2	-2.11748							325	MAPK15	-2.12984
326	AL139220.2	-2.11913							326	ITGA7	-2.13853
327	AL024508.2	-2.12223							327	PUS7L	-2.14156
328	GXYLT2	-2.13617							328	SAMD5	-2.15699
329	NELL2	-2.14429							329	FKBP1B	-2.16367
330	AP001107.5	-2.14625							330	ZNF37BP	-2.16441
331	COL9A3	-2.15023							331	AC005332.3	-2.16738
332	KIT	-2.15293							332	AC048341.2	-2.16755
333	GAS6-AS1	-2.15608							333	AP003119.2	-2.17199
334	KDELR3	-2.16551							334	FAM13C	-2.17226
335	MEOX1	-2.16903							335	MYLK-AS1	-2.1734
336	FRK	-2.17456							336	PKD1L2	-2.17975
337	HEY1	-2.17742							337	AL049555.1	-2.18011
338	PRSS16	-2.17934							338	CALD1	-2.19573
339	MYLIP	-2.18058							339	IGSF10	-2.19575
340	LMO1	-2.18343							340	JPH2	-2.19804
341	ABCC6	-2.19837							341	PGAP1	-2.21248
342	CAMTA1-IT1	-2.20884							342	KIF5A	-2.2361
343	HSPA2	-2.21425							343	TPTEP1	-2.24938
344	GYG2	-2.2225							344	CPS1	-2.25185
345	FAM13C	-2.24099							345	AC135983.2	-2.26414
346	TSPAN13	-2.2586							346	GPR155	-2.26821
347	DUSP16	-2.26273							347	HERC2P9	-2.27006
348	AC010754.1	-2.27095							348	AC006058.1	-2.27033
349	PPEF1	-2.27329							349	AC007216.3	-2.27282
350	MAST4	-2.27498							350	TC2N	-2.27548
351	DRP2	-2.27861							351	SPATA12	-2.27733
352	AP005229.2	-2.2863							352	CCNYL2	-2.31468
353	CTSV	-2.28747							353	FBXL8	-2.3173
354	AL353622.1	-2.29443							354	AL024508.2	-2.31953
355	ENTPD2	-2.2985							355	MYOCD	-2.32436
356	TSHZ2	-2.29857							356	AC025449.1	-2.33221
357	CPT1C	-2.30166							357	CCL2	-2.34091
358	DIO3OS	-2.31768							358	KIT	-2.34461
359	RPL7AP34	-2.31873							359	KCTD12	-2.34605
360	EPPK1	-2.33808							360	PLEKHH1	-2.35627
361	RNASEL	-2.33868							361	MEG9	-2.37048
362	SLC2A4	-2.34242							362	ALPI	-2.37429
363	AL450043.1	-2.35965							363	CSPG5	-2.37759
364	ZNF488	-2.37514							364	AC091181.1	-2.37794
365	ACTA2	-2.39616							365	VIPR1	-2.38409
366	PDE1C	-2.39757							366	LGSN	-2.39204
367	GLP2R	-2.41584							367	AL390728.6	-2.39845
368	CLIC3	-2.41858							368	SUCLG2-AS1	-2.41098
369	LINC01411	-2.42723							369	SPACA6P-AS	-2.41802
370	RAB6B	-2.43242							370	HPGD	-2.43281
371	MEG9	-2.45539							371	DIO2	-2.43307
372	CACNG4	-2.45832							372	MUC1	-2.43981
373	AC100803.2	-2.49067							373	MAMDC2	-2.44876
374	CD27-AS1	-2.50228							374	SEMA3C	-2.45357
375	FBLN5	-2.51046							375	AC073857.1	-2.45845
376	MT-TE	-2.52597							376	FAM102B	-2.46235
377	IGF1	-2.55742							377	PRR15	-2.46301
378	RNASE4	-2.58156							378	BMPER	-2.46711
379	ID2	-2.5835							379	RHOV	-2.48036
380	NOXA1	-2.58751							380	AC092821.1	-2.48298
381	NPAS4	-2.59483							381	AC127502.2	-2.48369
382	UNC5D	-2.60523							382	DRP2	-2.4865
383	REEP1	-2.6057							383	SMC5	-2.48677
384	AC063944.1	-2.61587							384	MRAP2	-2.48916
385	GPR143	-2.63305							385	SERPINI1	-2.49082
386	MAGED1	-2.65425							386	AC107068.1	-2.51579
387	PRSS56	-2.65695							387	TSHZ2	-2.52777
388	LMTK3	-2.67869							388	OGDHL	-2.53014
389	AC023137.1	-2.68362							389	ANKRD10-IT1	-2.53804
390	PKD1L2	-2.6889							390	AC114490.1	-2.54139
391	SAMD11	-2.70847							391	AC015799.1	-2.54854
392	KANK4	-2.72551							392	AL035461.2	-2.57796
393	ETNPPL	-2.73117							393	PCF11-AS1	-2.58583
394	PTGES3L-AARSD1	-2.73707							394	IKZF2	-2.60207
395	PIGZ	-2.7554							395	MYH10	-2.60243
396	ARMCX1	-2.79316							396	AL109918.1	-2.60698
397	ANO9	-2.79659							397	SEMA6B	-2.60996
398	SLC6A16	-2.80223							398	AL136295.6	-2.62435
399	EGFL7	-2.83079							399	AC241952.1	-2.62486
400	PKDCC	-2.84353							400	AP000357.2	-2.64327
401	CIITA	-2.85158							401	PPP2R2B	-2.64749
402	AL033530.1	-2.87209							402	STARD4-AS1	-2.64839
403	ALPI	-2.90122							403	FBLN7	-2.64965
404	AL161668.1	-2.92487							404	PLCL1	-2.65219
405	ZNF350-AS1	-2.96194							405	ZNF204P	-2.65274
406	IL32	-2.96535							406	ZNF439	-2.66113
407	SNORD72	-2.97261							407	GBP2	-2.6982
408	MELTF-AS1	-3.04729							408	SPINK6	-2.69995
409	LINC02593	-3.04795							409	EDN2	-2.70481
410	KCNU1	-3.08257							410	SAMD14	-2.72776
411	FBXO6	-3.08265							411	KCNU1	-2.73205
412	PCA3	-3.11176							412	KCNIP3	-2.75183
413	CHRDL2	-3.13487							413	FAR2P4	-2.75605
414	AC018695.6	-3.16743							414	PMCH	-2.76219
415	AL031123.2	-3.19245							415	TTPA	-2.77187
416	ABCC8	-3.19536							416	CYP24A1	-2.77358
417	NIPAL2	-3.20309							417	IL17RB	-2.7891
418	PAPPA2	-3.21039							418	CAVIN2	-2.81602
419	XKR6	-3.24583							419	AL080317.1	-2.82714
420	P2RY6	-3.26518							420	HBQ1	-2.83818
421	ACTC1	-3.29516							421	AP002364.1	-2.83993
422	CNN1	-3.32237							422	NRCAM	-2.84293
423	S100A1	-3.38161							423	XKR6	-2.84547
424	CCDC3	-3.41508							424	MIR1254-1	-2.85067
425	AC091980.2	-3.4322							425	PDE1A	-2.85081
426	GOLGA6L4	-3.44092							426	AL355488.1	-2.85201
427	ELOVL2	-3.44153							427	DLEU2L	-2.85784
428	AC134407.3	-3.44233							428	RN7SL67P	-2.86136
429	AC004461.2	-3.44901							429	SNORD93	-2.87087
430	CCDC180	-3.47842							430	CHMP1B-AS1	-2.90976
431	AC010536.1	-3.48421							431	VN1R81P	-2.91004
432	CCDC144NL-AS1	-3.49387							432	PTCSC2	-2.91191
433	ABCC6P1	-3.50803							433	WDR86	-2.91782
434	AC073195.1	-3.51871							434	PCA3	-2.92082
435	AC069029.1	-3.52486							435	NR5A2	-2.93242
436	FAR2P1	-3.53148							436	AP000866.2	-2.93555
437	ITK	-3.60441							437	GAS6-AS1	-2.93746
438	FGF22	-3.61002							438	VGLL3	-2.95251
439	PNMA8A	-3.63418							439	SLC44A5	-2.95718
440	AL021878.2	-3.64097							440	GREM2	-2.96717
441	AP003419.3	-3.64151							441	AXIN2	-2.96875
442	PCYT1B	-3.65284							442	ANKRD18A	-2.97026
443	KLF17	-3.82706							443	AC099811.5	-2.971
444	AC006557.4	-3.85228							444	STON1	-2.97176
445	AC099811.5	-3.8559							445	P2RY6	-2.97728
446	MXRA5Y	-3.86021							446	NMNAT3	-2.98128
447	ABHD1	-3.86904							447	PLCL2	-2.98792
448	RN7SL138P	-3.87828							448	AC092724.1	-2.99221
449	PTPRN	-3.89197							449	AC140481.3	-2.99851
450	LINC02012	-3.92775							450	AC024060.1	-3.0275
451	KLHL41	-3.94103							451	L3MBTL4-AS1	-3.0353
452	AC011468.2	-3.94187							452	AL513548.1	-3.05826
453	LCN10	-3.96368							453	Z98884.2	-3.06521
454	AL445231.1	-3.99044							454	DPYSL5	-3.07441
455	RAMP2	-4.03918							455	MAGED1	-3.08442
456	NKX2-5	-4.07228							456	TLR2	-3.0956
457	AC092645.1	-4.09131							457	AL353622.1	-3.11281
458	ACRBP	-4.11244							458	MIR5581	-3.11689
459	LRRC32	-4.13343							459	AL390066.1	-3.119
460	LDB3	-4.15023							460	TAS2R10	-3.12968
461	DAPL1	-4.16962							461	PTH2R	-3.13509
462	ASB4	-4.20718							462	FMR1-AS1	-3.17198
463	PPFIA4	-4.21033							463	MROH7	-3.17405
464	MAPK4	-4.29641							464	A2M	-3.18956
465	HES2	-4.33957							465	ZNF433	-3.19571
466	AP000924.1	-4.39776							466	AC023090.2	-3.19813
467	WSCD1	-4.48972							467	PIWIL3	-3.22054
468	AC009336.2	-4.49338							468	AC091185.1	-3.22234
469	ARSD	-4.67121							469	SLC16A12	-3.23626
470	ZMYND10	-5.1969							470	AP000553.5	-3.23638
471	EDN2	-5.6547							471	AC087632.1	-3.24781
472	HSPB3	-5.89828							472	AP002847.1	-3.24903
473	UTS2	-7.47176							473	DAPL1	-3.24911
474	C1QTNF3-AMACR	-30.5811							474	KLHL41	-3.27139
									475	UGT1A1	-3.27573
									476	COX5BP6	-3.2845
									477	MRO	-3.29311
									478	ZFPM2	-3.29455
									479	AC087239.1	-3.29489
									480	PCDHB18P	-3.32535
									481	CFTR	-3.33391
									482	ARHGAP31-AS1	-3.33952
									483	FAM133A	-3.34761
									484	CFAP69	-3.34809
									485	ST8SIA4	-3.37265
									486	AC063944.1	-3.38329
									487	AL445490.1	-3.38369
									488	AC026704.1	-3.38847
									489	AC122129.1	-3.39132
									490	AC084036.1	-3.40012
									491	Z99129.4	-3.4078
									492	CHRFAM7A	-3.41346
									493	AL117190.1	-3.41842
									494	LYL1	-3.4269
									495	AL033530.1	-3.44834
									496	TSHR	-3.45568
									497	LINC01132	-3.4667
									498	AL772363.1	-3.48804
									499	SAPCD1	-3.49263
									500	ENHO	-3.49539
									501	SNORA80E	-3.50201
									502	AC053513.1	-3.5152
									503	AP006623.1	-3.51612
									504	LINC01366	-3.56786
									505	NPB	-3.5698
									506	AL590666.3	-3.57725
									507	ZNF441	-3.57913
									508	KCNH5	-3.59853
									509	RN7SKP70	-3.6003
									510	PCOLCE-AS1	-3.60119
									511	AC099811.1	-3.62004
									512	KLF17	-3.62181
									513	PPFIA4	-3.62429
									514	AC012651.1	-3.62547
									515	AC090692.3	-3.63332
									516	SBSPON	-3.64344
									517	LINC00702	-3.64426
									518	AC104785.1	-3.67059
									519	ZNF506	-3.67459
									520	AL390067.1	-3.69593
									521	PLEKHG6	-3.69897
									522	AL356801.1	-3.71816
									523	AL157394.1	-3.72663
									524	POU2F3	-3.73866
									525	AC139530.3	-3.7393
									526	ERVV-2	-3.75291
									527	AKAP5	-3.75587
									528	AL049650.1	-3.76045
									529	AC106892.1	-3.79686
									530	HYDIN2	-3.81962
									531	FAR2P1	-3.83419
									532	MEOX1	-3.83435
									533	FRMPD3	-3.84683
									534	AL132780.5	-3.8573
									535	AL451050.2	-3.8605
									536	MARCOL	-3.87467
									537	EBLN2	-3.9138
									538	LINC02302	-4.01978
									539	AP000787.1	-4.03784
									540	AC132068.1	-4.08329
									541	AL121839.2	-4.09725
									542	AC092611.1	-4.1682
									543	NKX2-1	-4.22571
									544	HOXC4	-4.24988
									545	AL110118.2	-4.25403
									546	PI16	-4.26072
									547	PLCXD3	-4.26278
									548	TET1	-4.29402
									549	FCRL5	-4.34303
									550	ZNF214	-4.35868
									551	C1orf140	-4.49293
									552	SRGAP3	-4.52347
									553	PCYT1B	-4.67058
									554	AC092645.1	-4.82052
									555	CA5A	-4.82142
									556	TCF24	-4.82171
									557	ZNF69	-5.09979
									558	NKD1	-5.17918
									559	APBA2	-5.2582
									560	AC040160.1	-5.61621
									561	GOLGA8N	-5.65297
									562	MIR497HG	-5.82913
									563	ZNF521	-6.90653
									564	CADM2	-7.72356
									565	AL163636.2	-7.75502
