# Supplementary material for: Human vtRNA1-1 Levels Modulate Signaling Pathways and Regulate Apoptosis in Human Cancer Cells
Source: Biomolecules. 2020 Apr 16;10(4):614. doi: 10.3390/biom10040614 (PMC7226377; doi:10.3390/biom10040614)
Supplement: Supplementary file 1 [file biomolecules-10-00614-s001.zip › Supplementary Dataset S2.xlsx]

## Sheet: MS_Analysis
Affinity Purification of native in vivo assembled vtRNA-RNP_LC-MS/MS
the top 200 proteins identified for vtRNA1-1 and vtRNA1-2 affinity purification
vtRNA1-1			vtRNA1-2
Gene_ID	FDR		Gene_ID	FDR
STK10	0.1183		CCDC91	0.4398
MSH6	0.3463		GAPVD1	0.8145
ARHGEF7	0.4982		NELFE	0.8461
DDX17	0.5351		DHX38	0.8585
HSPH1	0.5644		NSFL1C	0.8622
GIT1	0.5896		HSDL1	0.8691
PPP1CC	0.6112		SSH2	0.8723
PLEC	0.6289		WIPF1	0.8936
SIPA1L3	0.646		SEC31A	0.9073
PICALM	0.6608		ACTG1	0.9996
NOMO1	0.677		MYH9	0.9996
GIT2	0.6912		ACTB	0.9996
SPTBN1	0.7043		MYL6	0.9996
TWF2	0.7173		RNH1	0.9996
CAPZA1	0.729		HUWE1	0.9996
DCTN4	0.7403		TUBA1B	0.9996
RNMT	0.7504		TPM3	0.9996
PPP1R12B	0.7596		EEF1A1	0.9996
AMOTL1	0.7685		MYL12A	0.9996
METTL3	0.7772		MYO1E	0.9996
LSP1	0.7855		IGHG1	0.9996
TJP2	0.7936		TUBB4B	0.9996
AIM1	0.8011		MYH11	0.9996
TJP1	0.8145		ACTC1	0.9996
TPM1	0.8206		TUBB	0.9996
DDB1	0.8263		NIPSNAP1	0.9996
ARHGAP4	0.8317		NCL	0.9996
FLII	0.8367		TUBB2B	0.9996
CCDC102A	0.8416		FKBP11	0.9996
SLC25A10	0.8505		TPM3	0.9996
TWF1	0.8585		GBAS	0.9996
TRIOBP	0.8657		HSPD1	0.9996
PPP1R12A	0.8754		DOK2	0.9996
EDC4	0.8783		TUBB8	0.9996
NUAK2	0.8812		HSPB1	0.9996
LIMD2	0.8839		HSPA8	0.9996
PPP1CA	0.8864		PKM	0.9996
SPTBN2	0.8936		CORO7	0.9996
WEE1	0.8936		CD37	0.9996
PPP1CB	0.8979		HSP90AB1	0.9996
SPTA1	0.8979		MAB21L1	0.9996
CBX3	0.8999		ZRANB2	0.9996
RBM39	0.9018		TPM4	0.9996
ARHGAP15	0.9073		DNAJC19	0.9996
CAMK2G	0.9073		DCTN5	0.9996
ACTG1	0.9996		MS4A1	0.9996
MYH9	0.9996		PAICS	0.9996
ACTB	0.9996		U2SURP	0.9996
MYL6	0.9996		AP3D1	0.9996
ACTC1	0.9996		PHGDH	0.9996
EEF1A1	0.9996		TMOD3	0.9996
MYL12A	0.9996		METTL7A	0.9996
TPM3	0.9996		RABL6	0.9996
MYO1E	0.9996		RPL38	0.9996
RNH1	0.9996		PHB	0.9996
TUBA1B	0.9996		ACADM	0.9996
MYH11	0.9996		SRP14	0.9996
PKM	0.9996		FRG1	0.9996
NCL	0.9996		COPA	0.9996
TUBB4B	0.9996		CAPZA1	0.9996
PPP1R18	0.9996		GAPDH	0.9996
TUBB	0.9996		STIP1	0.9996
IGHG1	0.9996		IGHM	0.9996
HSPD1	0.9996		UBTF	0.9996
HSPB1	0.9996		PCBP1	0.9996
DSG3	0.9996		MT-ATP8	0.9996
TPM3	0.9996		GFPT1	0.9996
MYO18A	0.9996		TIMM44	0.9996
FKBP11	0.9996		HIST2H2AC	0.9996
TUBB2B	0.9996		RAP1A	0.9996
CORO7	0.9996		SF3B2	0.9996
TMOD3	0.9996		NDUFAF2	0.9996
NIPSNAP1	0.9996		NOLC1	0.9996
HSPA8	0.9996		CD74	0.9996
MAB21L1	0.9996		RALA	0.9996
GBAS	0.9996		PFKP	0.9996
HSP90AB1	0.9996		CAPZB	0.9996
GAPDH	0.9996		HIST1H2BM	0.9996
DOK2	0.9996		CPSF6	0.9996
TPM4	0.9996		PHB2	0.9996
DNAJC19	0.9996		ATP5O	0.9996
IQGAP1	0.9996		CALM1	0.9996
TUBB8	0.9996		IQGAP1	0.9996
PPP1R9B	0.9996		TUFM	0.9996
ACSL3	0.9996		ATP5J2	0.9996
PAICS	0.9996		SEPT9	0.9996
ENO1	0.9996		PEX11B	0.9996
COPA	0.9996		SMIM20	0.9996
STIP1	0.9996		FBXO30	0.9996
AP3D1	0.9996		PPP1R12A	0.9996
ATP5A1	0.9996		CCT3	0.9996
CPSF6	0.9996		ATP5C1	0.9996
PHB	0.9996		SF3A3	0.9996
U2SURP	0.9996		ACSL3	0.9996
SRGAP2	0.9996		SYK	0.9996
DBN1	0.9996		PRDX1	0.9996
SYK	0.9996		MTHFD1	0.9996
UBTF	0.9996		NPM1	0.9996
COPE	0.9996		TOP1	0.9996
NDUFAF2	0.9996		HLA-DRB1	0.9996
RPL38	0.9996		KPNB1	0.9996
CORO1C	0.9996		EEF1D	0.9996
IL16	0.9996		XPO1	0.9996
PHB2	0.9996		MYO18A	0.9996
ZRANB2	0.9996		HSP90AA1	0.9996
CAPZB	0.9996		CYB5R3	0.9996
HSPA1B	0.9996		COPE	0.9996
DCTN5	0.9996		RFC3	0.9996
MS4A1	0.9996		HSPA9	0.9996
FBXO30	0.9996		FAM204A	0.9996
METTL7A	0.9996		CCT8	0.9996
CHERP	0.9996		HIST1H1E	0.9996
SIPA1	0.9996		TRIM28	0.9996
LDHA	0.9996		EEF1G	0.9996
NOLC1	0.9996		TCOF1	0.9996
AKAP2	0.9996		ATP5J2	0.9996
PCBP1	0.9996		PCYT1A	0.9996
MT-ATP8	0.9996		SEC22B	0.9996
ADD3	0.9996		HNRNPU	0.9996
IGHM	0.9996		LRRC59	0.9996
RAP1A	0.9996		SNRNP27	0.9996
TCOF1	0.9996		LDHA	0.9996
LRRC59	0.9996		ADD3	0.9996
GFPT1	0.9996		IPO5	0.9996
RCC2	0.9996		SHMT2	0.9996
SRP14	0.9996		EEF2	0.9996
SEPT9	0.9996		NUDT21	0.9996
PHGDH	0.9996		TRMT10C	0.9996
CLTC	0.9996		SEPT7	0.9996
MTHFD1	0.9996		ATP5A1	0.9996
GSTP1	0.9996		SF3B3	0.9996
MYL6	0.9996		AP3S1	0.9996
HIST2H2AC	0.9996		SEPT6	0.9996
PPP1R12C	0.9996		PFN1	0.9996
ATP5C1	0.9996		EEF1B2	0.9996
CD74	0.9996		CCT6A	0.9996
PRDX1	0.9996		CLTC	0.9996
CCT8	0.9996		LMO7	0.9996
ACADM	0.9996		GCSAM	0.9996
ATP5J2	0.9996		EZR	0.9996
PFKP	0.9996		CACYBP	0.9996
RALA	0.9996		MYH14	0.9996
FRG1	0.9996		MCM3	0.9996
PPIA	0.9996		KRAS	0.9996
HSPA5	0.9996		DYNLL1	0.9996
TUFM	0.9996		TCP1	0.9996
EEF2	0.9996		IGKC	0.9996
SF3B2	0.9996		SDE2	0.9996
EEF1D	0.9996		RBFA	0.9996
KRAS	0.9996		HSPA5	0.9996
ALDOA	0.9996		CCT4	0.9996
COPB2	0.9996		USMG5	0.9996
TRIM28	0.9996		SF3A1	0.9996
LRRFIP2	0.9996		MYL6	0.9996
GTF2I	0.9996		FIP1L1	0.9996
PFN1	0.9996		TUBB3	0.9996
HIST1H1E	0.9996		PYCR1	0.9996
EEF1G	0.9996		YARS	0.9996
LDHB	0.9996		RPL37A	0.9996
SEC22B	0.9996		EIF5B	0.9996
CD37	0.9996		NUP153	0.9996
ATP5J2	0.9996		HIST1H4A	0.9996
NPM1	0.9996		SF3B1	0.9996
GALNT2	0.9996		PPP1CB	0.9996
PARP1	0.9996		DHX15	0.9996
RABL6	0.9996		CCT2	0.9996
RBM17	0.9996		ATP5H	0.9996
TIMM44	0.9996		PPP1CA	0.9996
GNB1	0.9996		Unknown	0.9996
SUB1	0.9996		FKBP8	0.9996
AP3S1	0.9996		HNRNPH1	0.9996
CCT2	0.9996		PCNT	0.9996
TUBA4A	0.9996		PFKM	0.9996
ATP5O	0.9996		CNN2	0.9996
MYH14	0.9996		CAPZA2	0.9996
SEPT6	0.9996		FASN	0.9996
XPO1	0.9996		LRRFIP1	0.9996
LRRFIP1	0.9996		LCP1	0.9996
SRSF2	0.9996		GALNT2	0.9996
CALM1	0.9996		SNRPB	0.9996
FAM204A	0.9996		COPB2	0.9996
EZR	0.9996		MYO1C	0.9996
SF3B3	0.9996		HNRNPK	0.9996
CFL1	0.9996		SLC25A5	0.9996
CNN2	0.9996		HLA-B	0.9996
FKBP8	0.9996		GARS	0.9996
LUC7L2	0.9996		RPS27A	0.9996
CAPZA2	0.9996		SRSF2	0.9996
HCLS1	0.9996		RBM17	0.9996
TUBB3	0.9996		MAP2K3	0.9996
HSPA9	0.9996		RPS19BP1	0.9996
CCT4	0.9996		PPIL4	0.9996
EPS15L1	0.9996		TUBA4A	0.9996
HNRNPK	0.9996		FEN1	0.9996
TOP1	0.9996		DECR1	0.9996
AP2A1	0.9996		FAM32A	0.9996
PAWR	0.9996		DDX46	0.9996
KPRP	0.9996		ADPGK	0.9996
HNRNPU	0.9996		ITPR2	0.9996
SHKBP1	0.9996		ATP5B	0.9996
